# Supplementary material for: Impact of crystal growth diversity on magneto-photoluminescence and circular dichroism in chiral lead halide perovskites
Source: Royal Society of Chemistry journal article supplement (doi:10.1039/d2tc03810b), 2022-01-01
Supplement: d2tc03810b1.pdf [file d2tc03810b1.pdf]

## Supplementary Information

# Impact of Crystal Growth Diversity on Magneto-Photoluminescence and Circular Dichroism in Chiral Lead Halide Perovskites

Ruiheng Pan,<sup>a,b,c</sup> Jiaji Hu,<sup>a,b</sup> Sheng Tao,<sup>a,b</sup> Lixuan Kan,<sup>a,b</sup> Haomiao Yu,<sup>a,b</sup> Kai Wang<sup>a,b,\*</sup>

<sup>a</sup> Key Laboratory of Luminescence and Optical Information, Ministry of Education, School of Physical Science and Engineering, Beijing Jiaotong University, Beijing, 100044, China

<sup>b</sup> Institute of Optoelectronics Technology, Beijing Jiaotong University, Beijing, 100044, China

<sup>c</sup> School of Science, Chongqing University of Posts and Telecommunications, Chongqing, 400065, China

\*Corresponding author: [kaiwang@bjtu.edu.cn](mailto:kaiwang@bjtu.edu.cn) (Kai Wang)

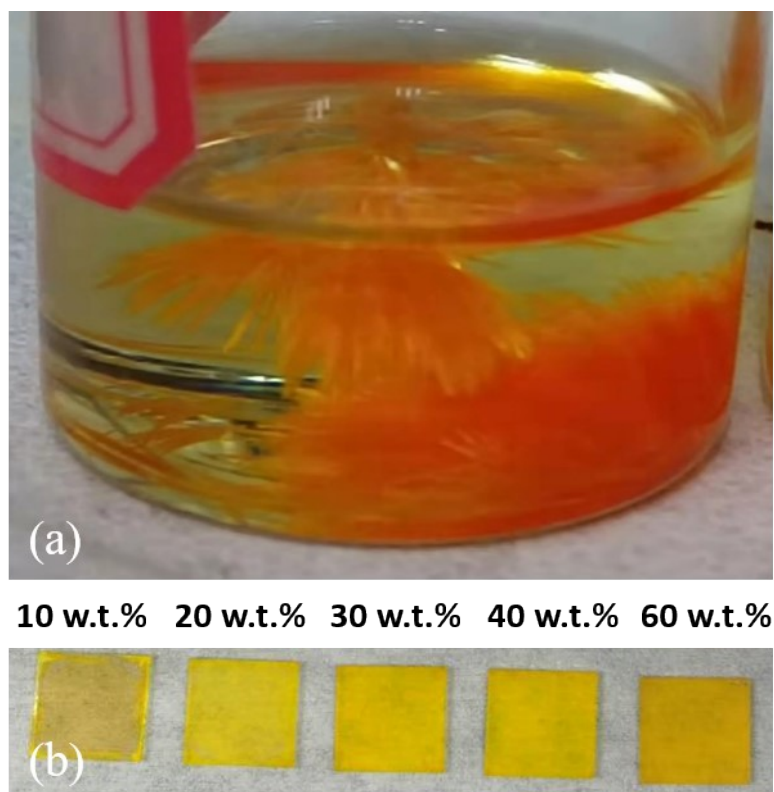

**S-Figure 1.** (a) The photographic image for the organic color needle-like single crystals  $(S\text{-MBA})_2\text{PbI}_4$  in the organic solvent. (b) The spin-coated  $(S\text{-MBA})_2\text{PbI}_4$  polycrystalline thin films after annealing. The w.t.% are 10, 20, 30, 40, 60 w.t.% respectively from left to right.

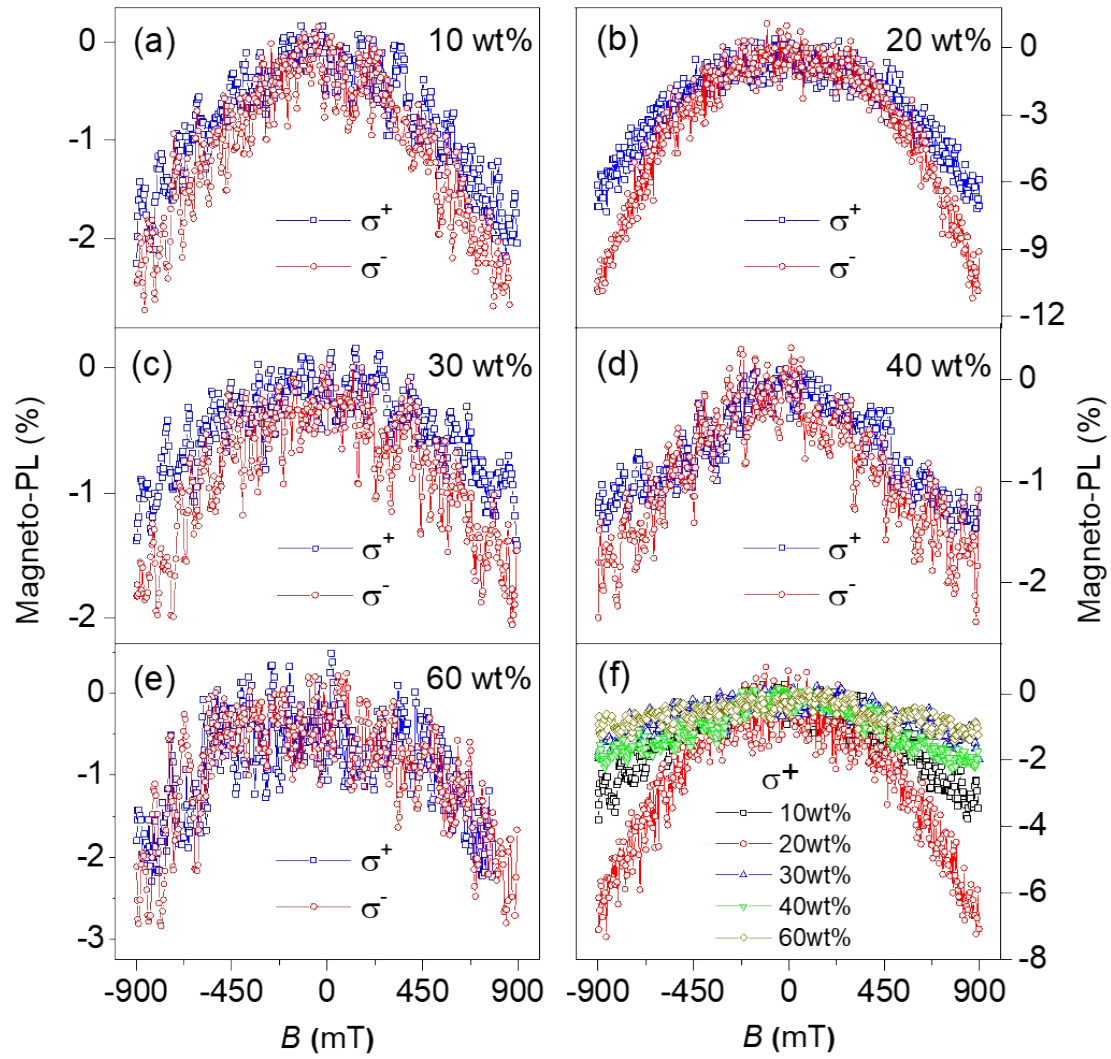

**S-Figure 2.** Experimental results of magneto-luminescence at 4 K due to the  $\sigma^+$  and  $\sigma^-$  photo-excitations for the  $(\text{S-MBA})_2\text{PbI}_4$  polycrystalline thin films. The films are fabricated by the precursors of different w.t.% such as (a) 10, (b) 20, (c) 30, (d) 40, (e) 60 w.t.%. (f) The comparison of the magneto-luminescence for the  $(\text{S-MBA})_2\text{PbI}_4$  thin films under the  $\sigma^+$  photo-excitation only at 4 K. The excitation wavelength is 405 nm.

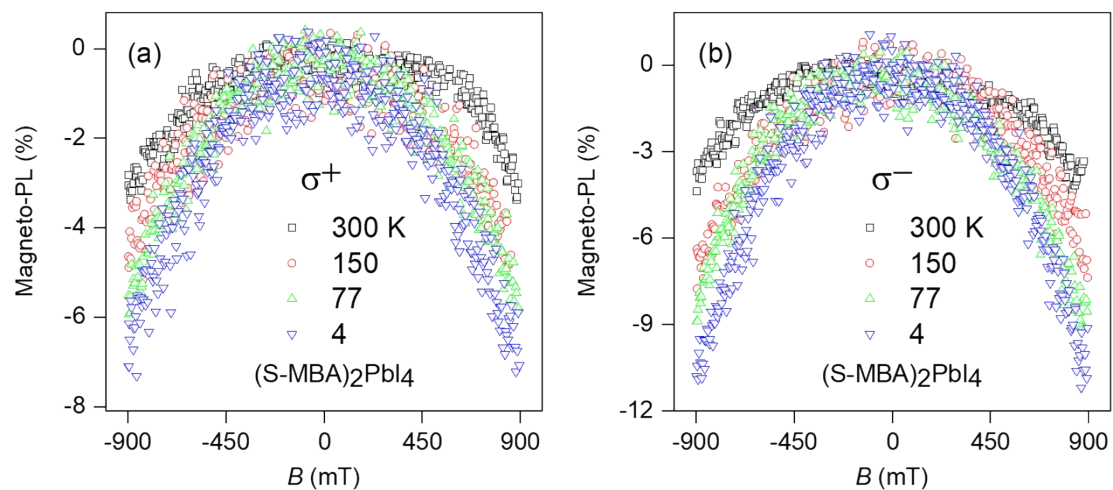

**S-Figure 3.** Experimental results of temperature-dependent magneto-luminescence for (S-MBA)<sub>2</sub>PbI<sub>4</sub> thin films. The precursor solution concentration is 20 w.t.%. The photo-excitation wavelength is 405 nm.

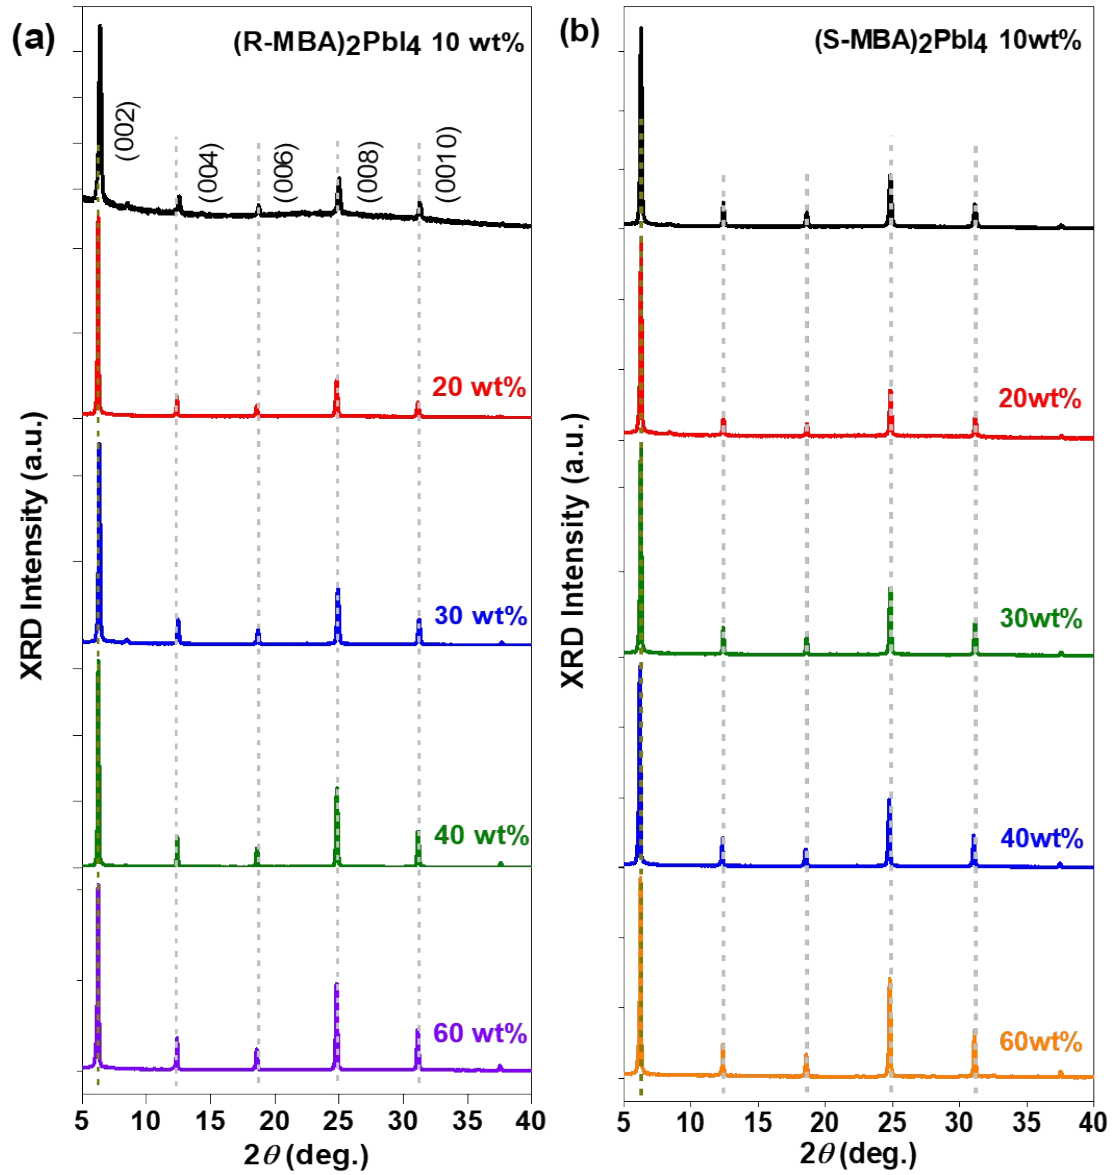

**S-Figure 4.** Experimental results of XRD spectra for (a) (R-MBA)<sub>2</sub>PbI<sub>4</sub> and (b) (S-MBA)<sub>2</sub>PbI<sub>4</sub> thin films fabricated by different w.t.% such as 10, 20, 30, 40, and 60 w.t.%.

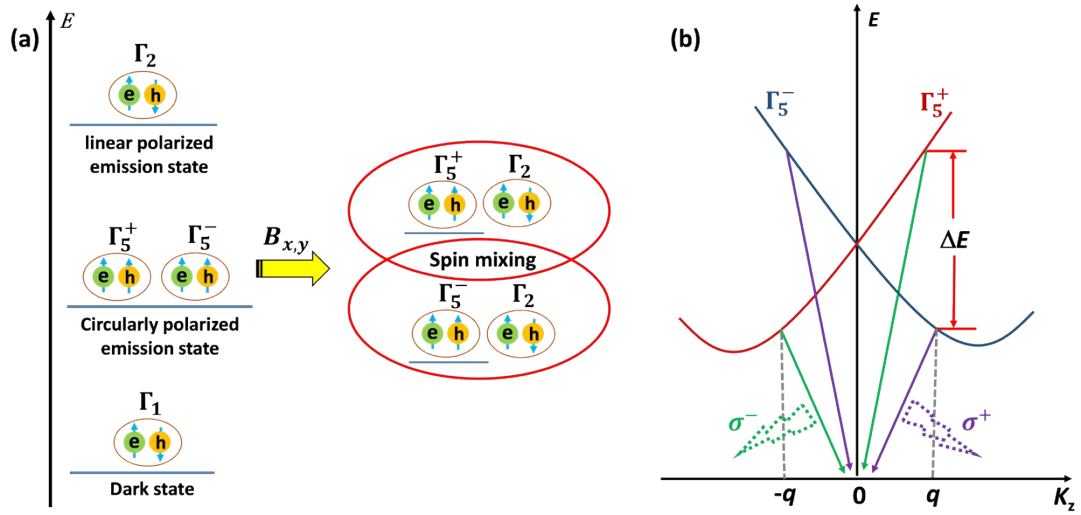

**S-Figure 5.** (a) Schematic illustration for the evolution of excitons states in LHP. (b) The dispersion relation of exciton states with the presence of CISOC.
